# Supplementary material for: The role of cyclones and potential vorticity cutoffs for the occurrence of unusually long wet spells in Europe
Source: Copernicus journal article supplement (doi:10.5194/wcd-3-733-2022), 2022-07-12
Supplement: Supplementary file 1 [file wcd-3-733-2022-supplement.pdf]

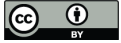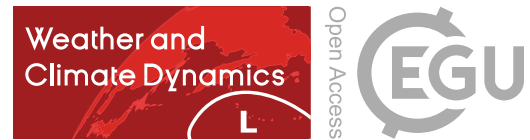

*Supplement of*

## **The role of cyclones and potential vorticity cutoffs for the occurrence of unusually long wet spells in Europe**

**Matthias Röthlisberger et al.**

*Correspondence to:* Matthias Röthlisberger ([matthias.roethlisberger@env.ethz.ch](mailto:matthias.roethlisberger@env.ethz.ch))

The copyright of individual parts of the supplement might differ from the article licence.

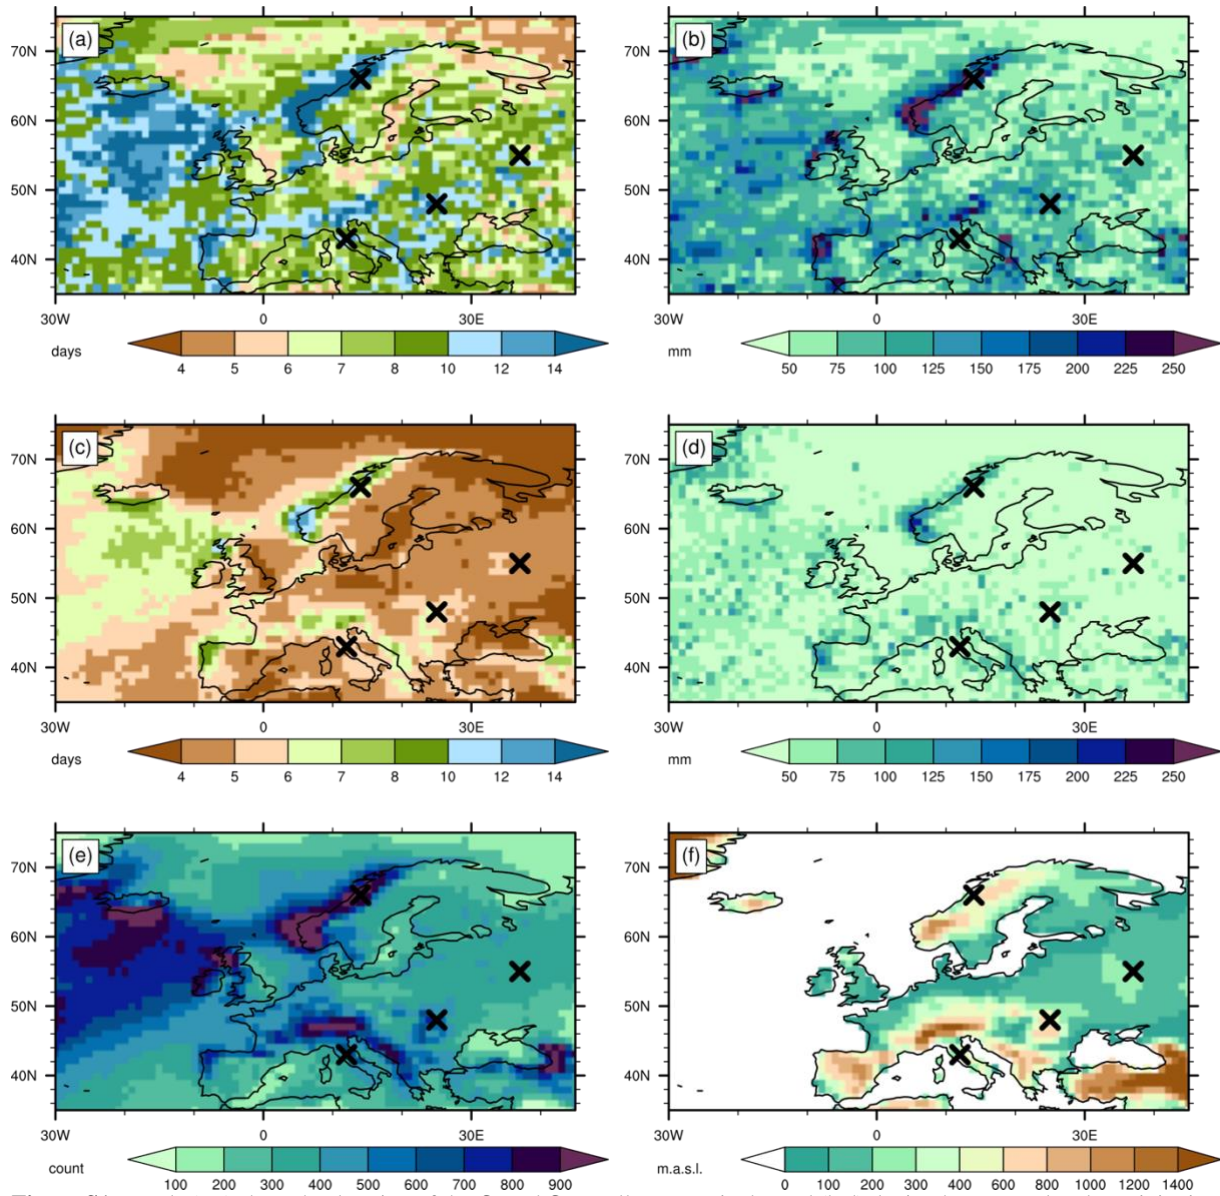

**Figure S1.** Panels (a,c) show the duration of the  $S_1$  and  $S_{20}$  spells, respectively, and (b,d) depict the accumulated precipitation during the  $S_1$  and  $S_{20}$  spells, respectively. Panel (e) shows the total number of wet spells with at least two days duration and panel (f) depicts the ERA-Interim topography. Crosses mark the locations of the four case studies discussed in Section 3.2.

5

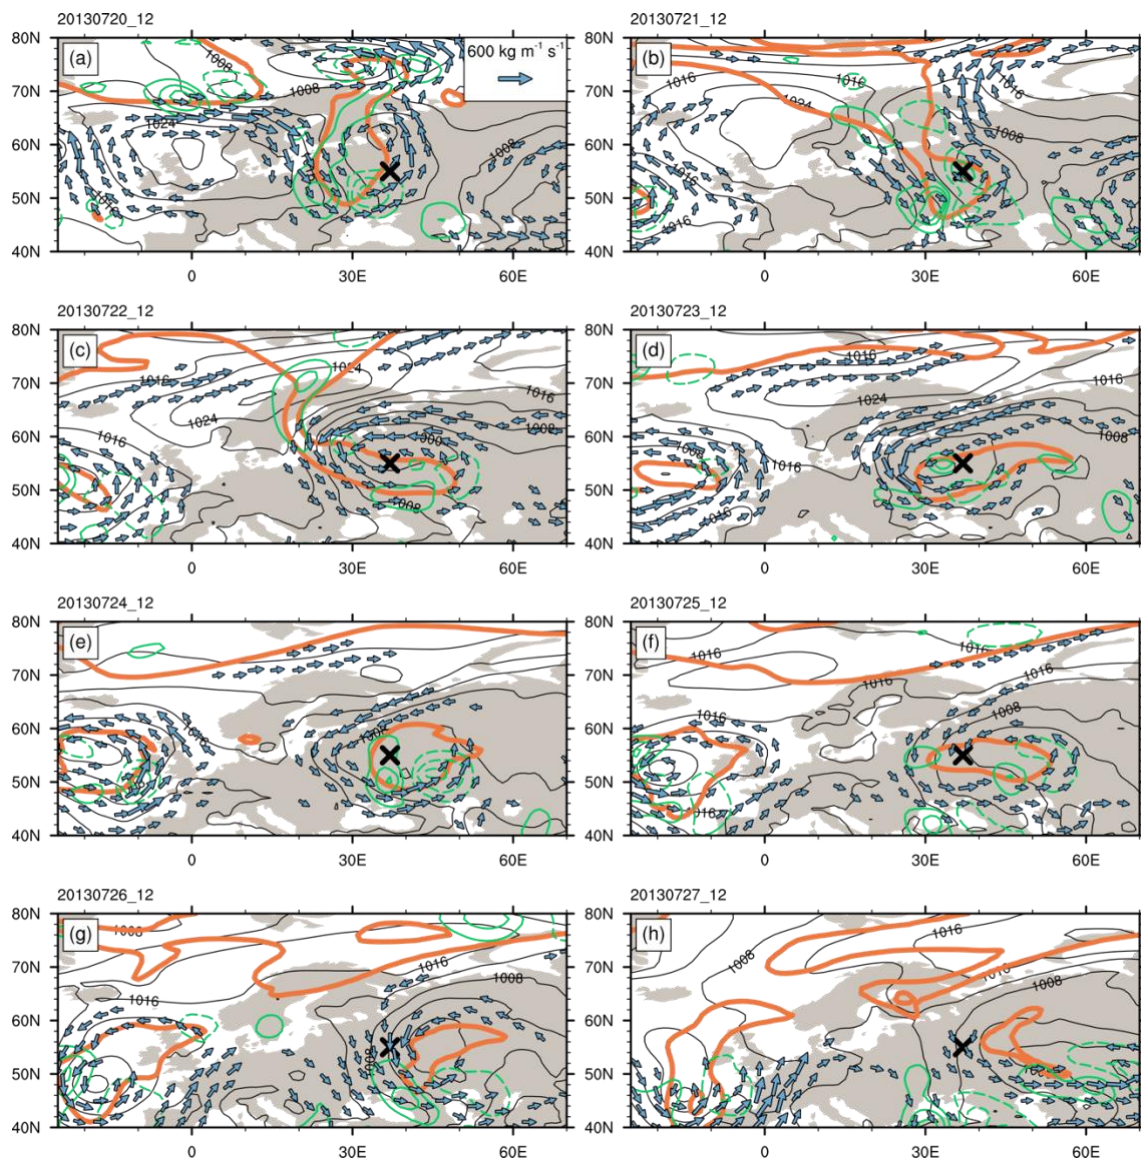

**Figure S2.** Additional synoptic variables for the the longest wet spell near Moscow, Russia [ $S_1$  ( $37^\circ$  E,  $55^\circ$  N)]. *IVT* (vectors, only drawn for  $IVT$  values  $> 200 \text{ kg m}^{-1} \text{ s}^{-1}$ ),  $QG\omega$  (green dashed contours indicating  $-6, -4, -2 \text{ hPa hour}^{-1}$  while solid contours depict  $2, 4, \text{ and } 6 \text{ hPa hour}^{-1}$ ). SLP (black) and  $2 \text{ PVU}$  on  $320 \text{ K}$  (orange) as in Fig. 3.

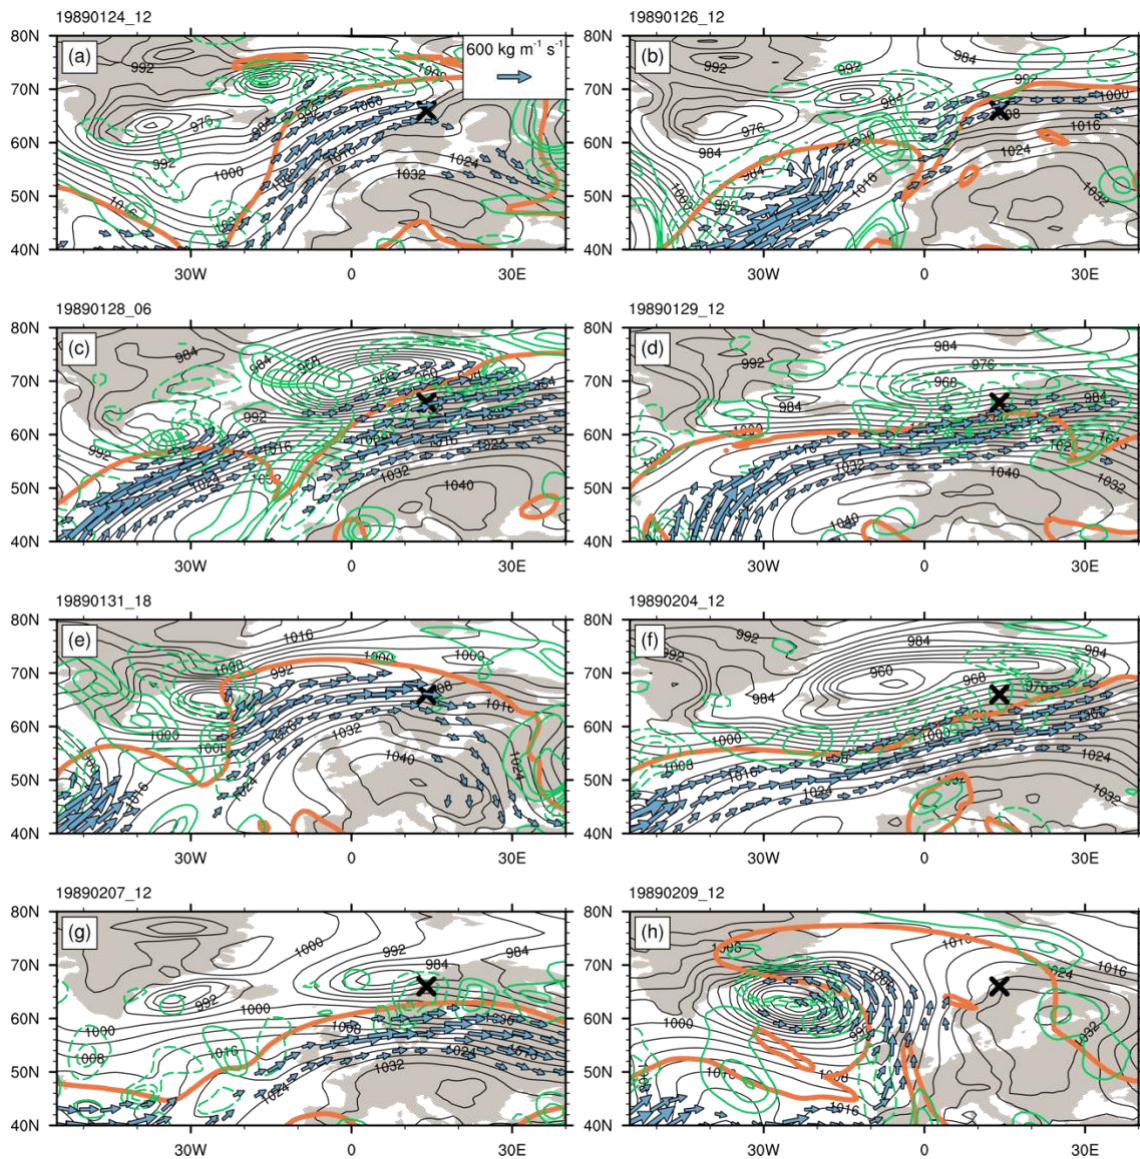

**Figure S3.** Additional synoptic variables for the longest wet spell at 14° E/66° N in Norway [ $S_1$  (14° E, 66° N)]. *IVT* (vectors, only drawn for  $IVT$  values  $> 200 \text{ kg m}^{-1} \text{ s}^{-1}$ ),  $QG\omega$  (green dashed contours indicating  $-6, -4, -2 \text{ hPa hour}^{-1}$  while solid contours depict  $2, 4, \text{ and } 6 \text{ hPa hour}^{-1}$ ). SLP (black) and 2 PVU on 310 K (orange) as in Fig. 4.

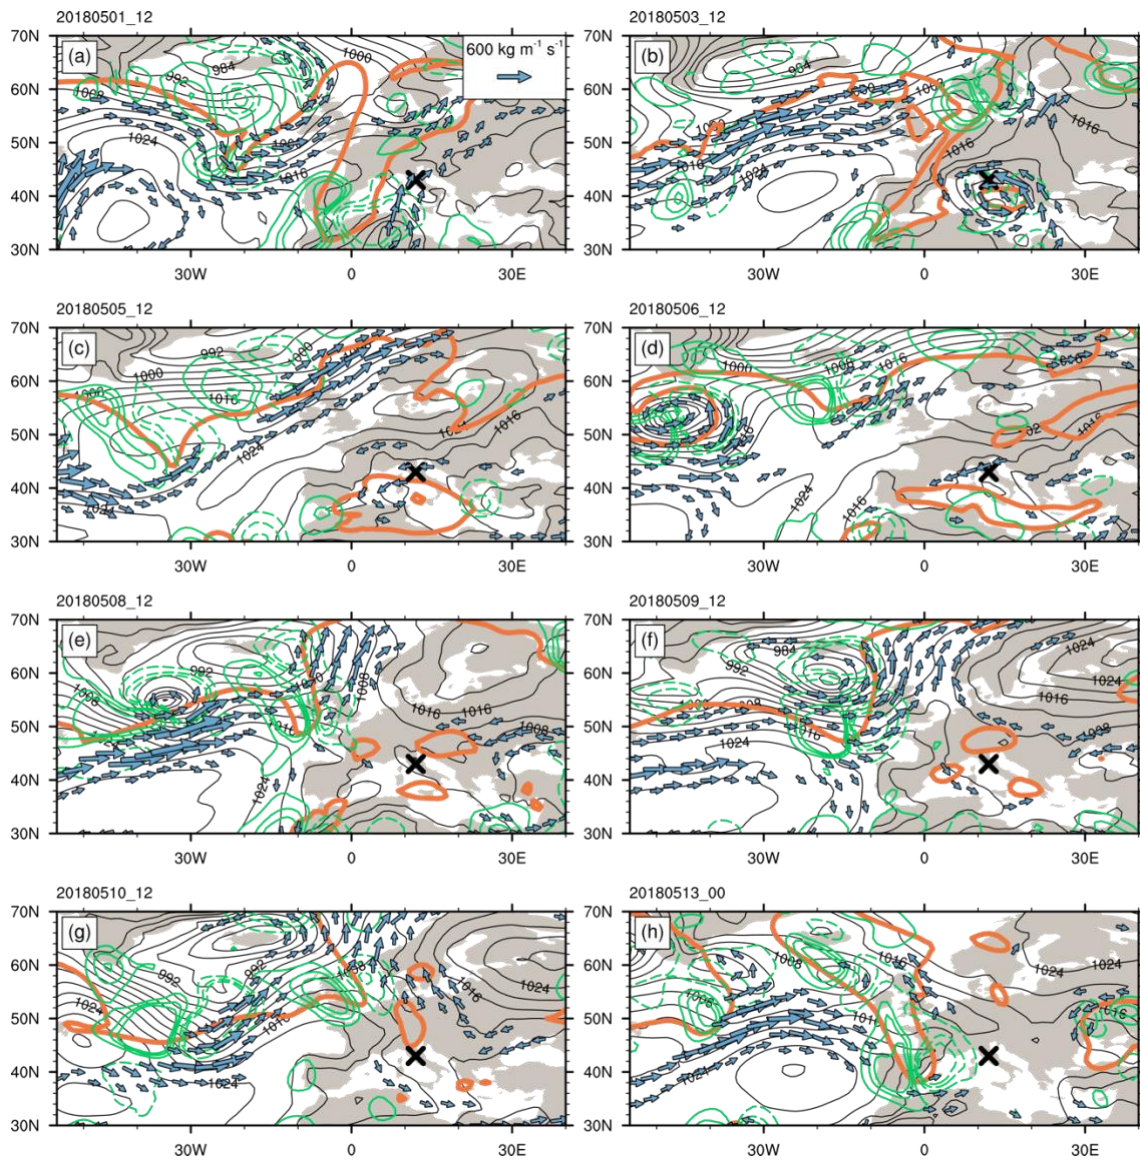

15

**Figure S4.** Additional synoptic variables for the the longest wet spell at 12° E/43° N in Tuscany, Italy [ $S_1$  (12° E, 43° N)]. *IVT* (vectors, only drawn for *IVT* values  $> 200 \text{ kg m}^{-1} \text{ s}^{-1}$ ),  $QG\omega$  (green dashed contours indicating -6, -4, -2 hPa hour<sup>-1</sup> while solid contours depict 2, 4, and 6 hPa hour<sup>-1</sup>). SLP (black) and 2 PVU on 320 K (orange) as in Fig. 5.

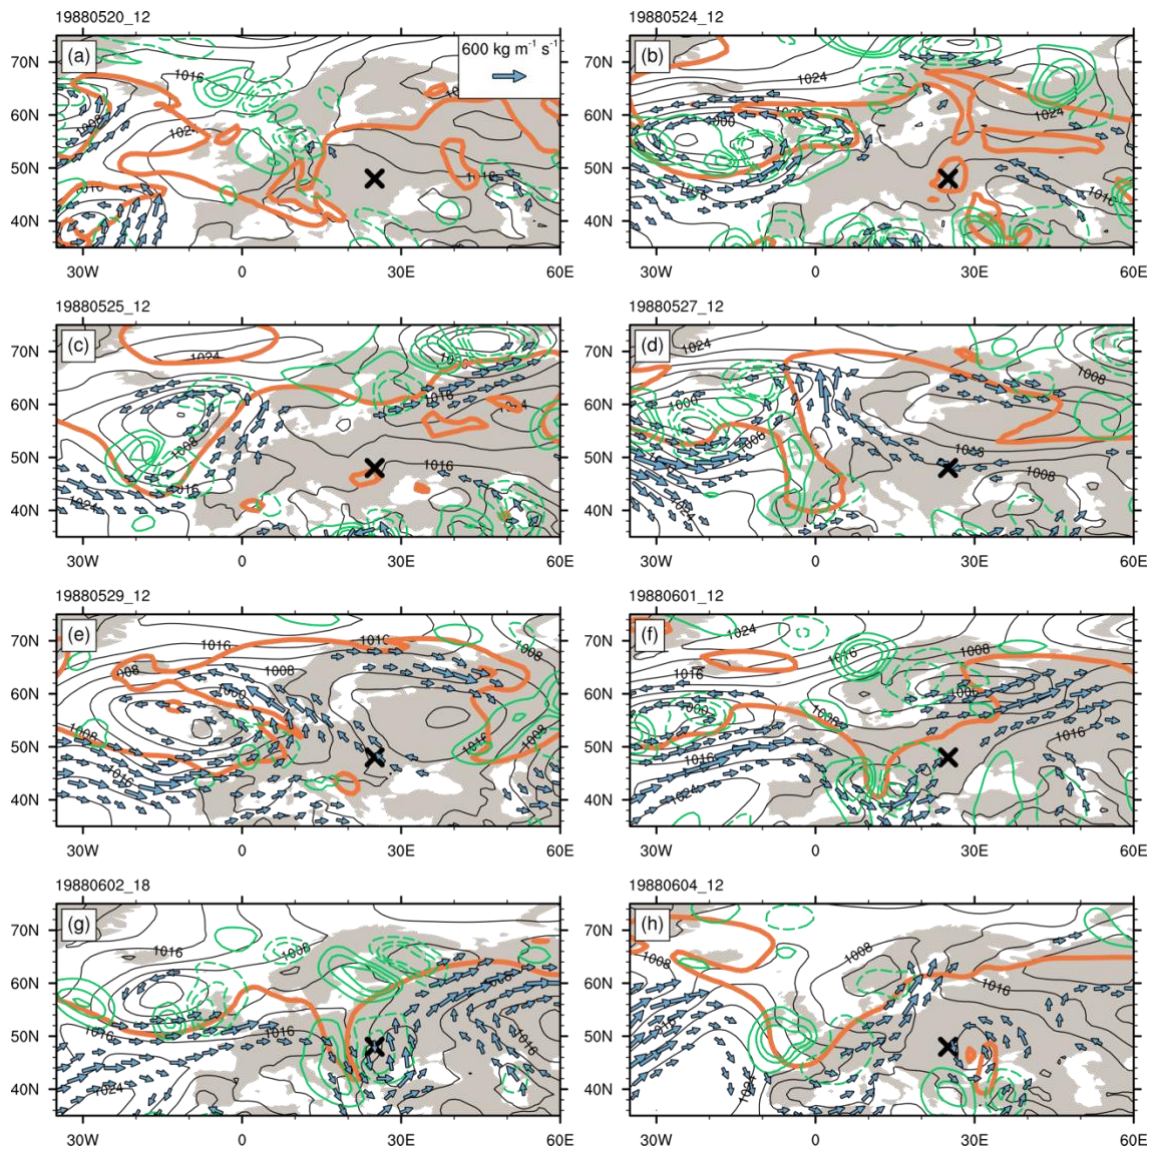

20

**Figure S5.** Additional synoptic variables for the the longest wet spell at 25° E/48° N in Romania [ $S_1$  (25° E, 48° N)]. *IVT* (vectors, only drawn for IVT values  $> 200 \text{ kg m}^{-1} \text{ s}^{-1}$ ), *QGω* (green dashed contours indicating -6, -4, -2 hPa hour<sup>-1</sup> while solid contours depict 2, 4, and 6 hPa hour<sup>-1</sup>). SLP (black) and 2 PVU on 320 K (orange) as in Fig. 6.

25

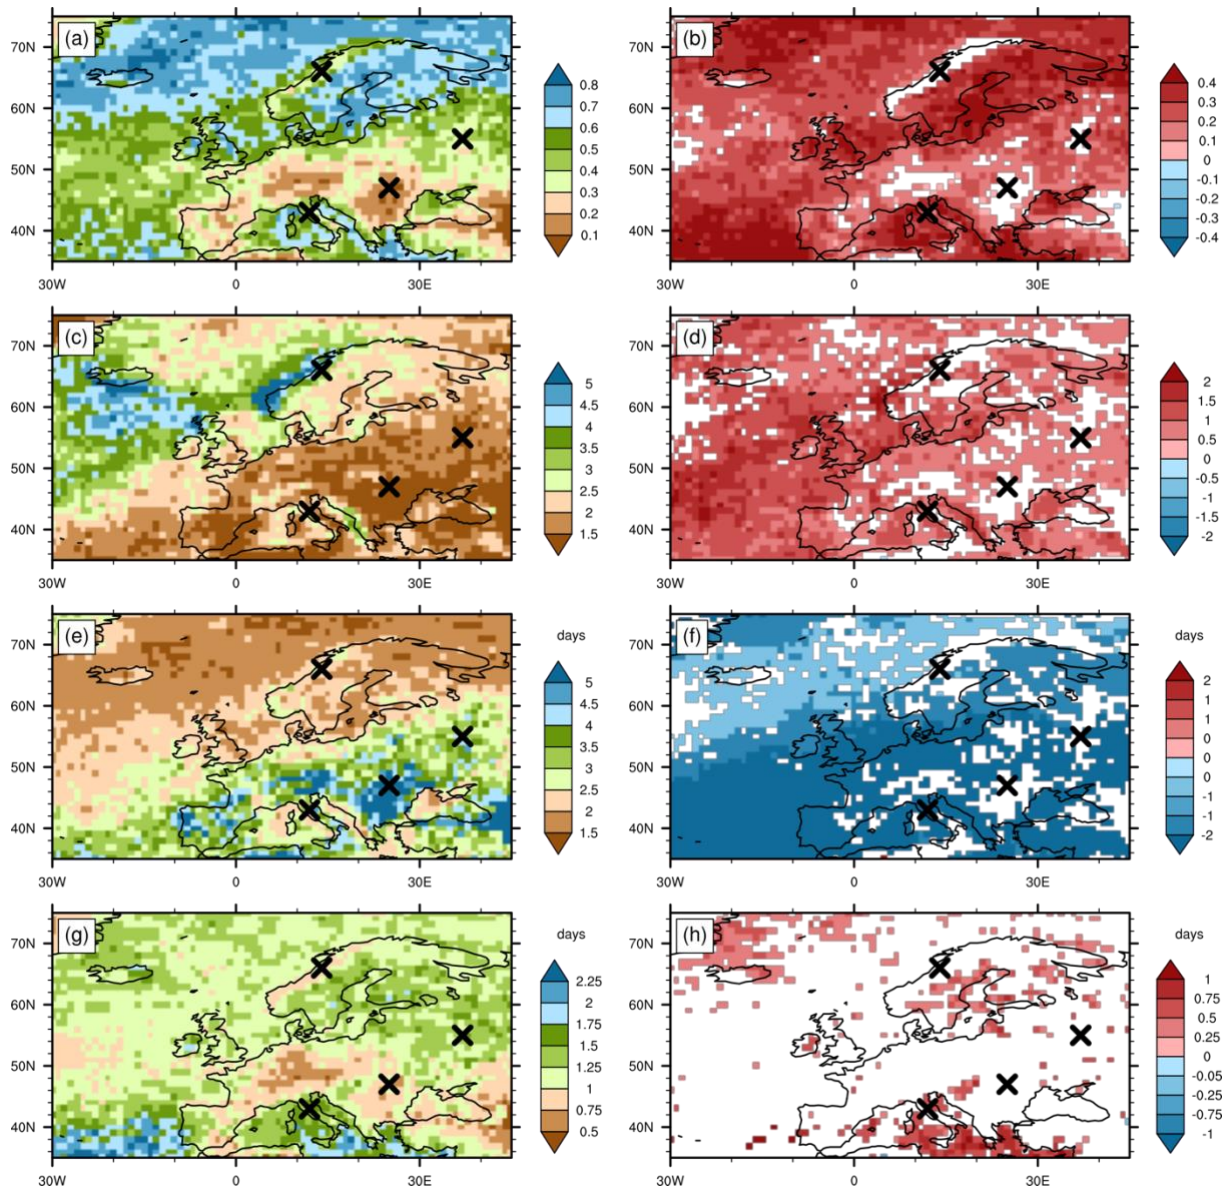

30 **Figure S6.** As Fig. 8 but with  $r = 200$  km.

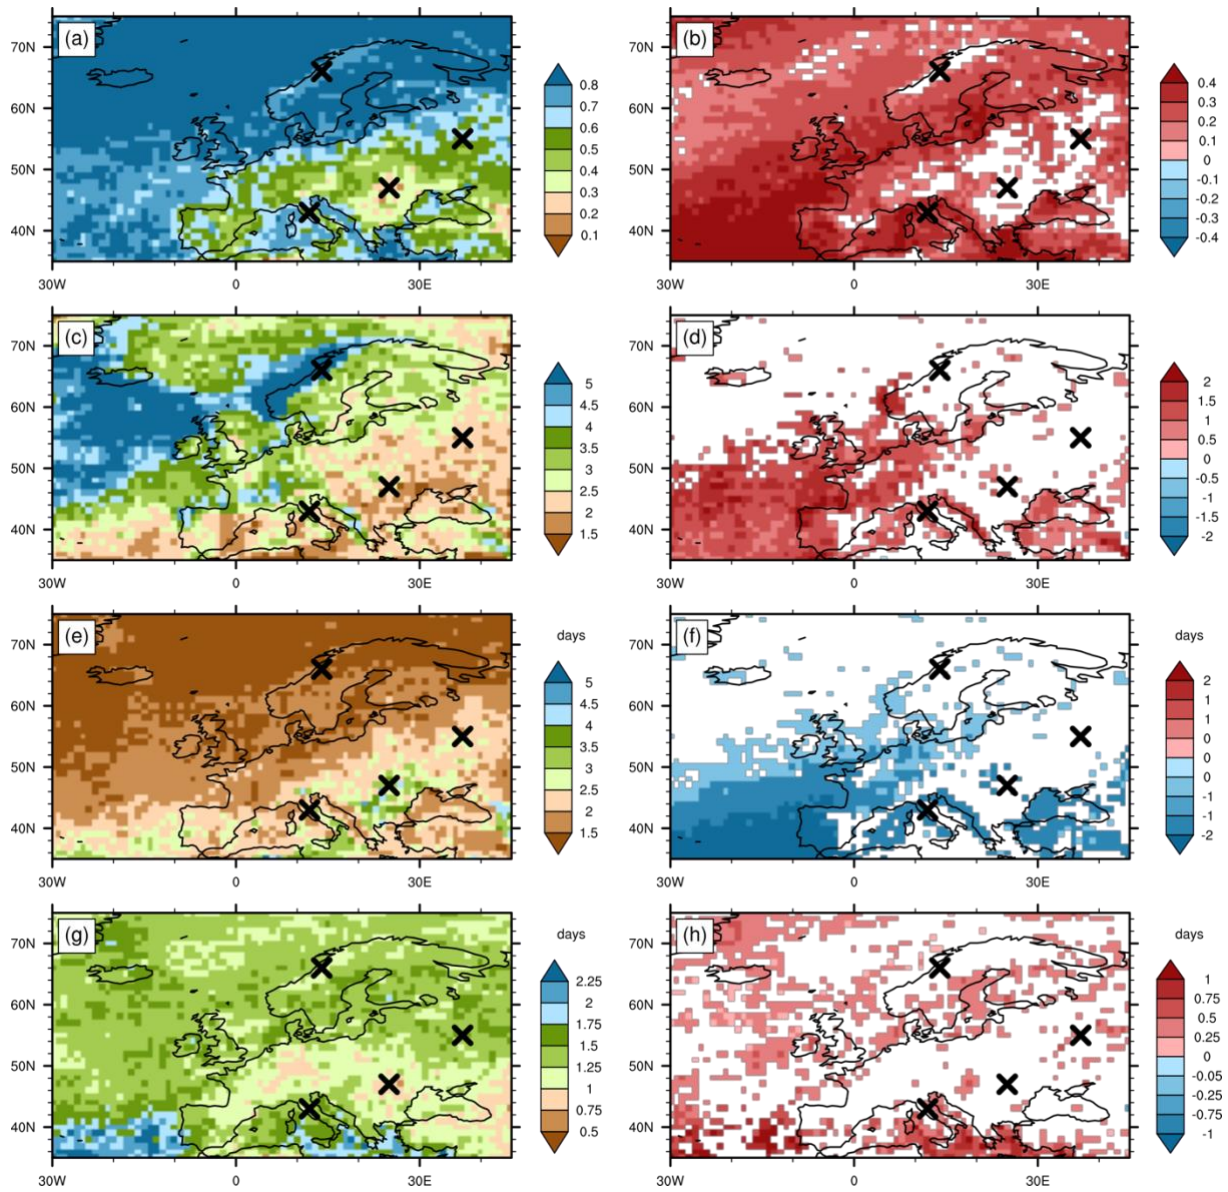

**Figure S7.** As Fig. 8 but with  $r = 600$  km.



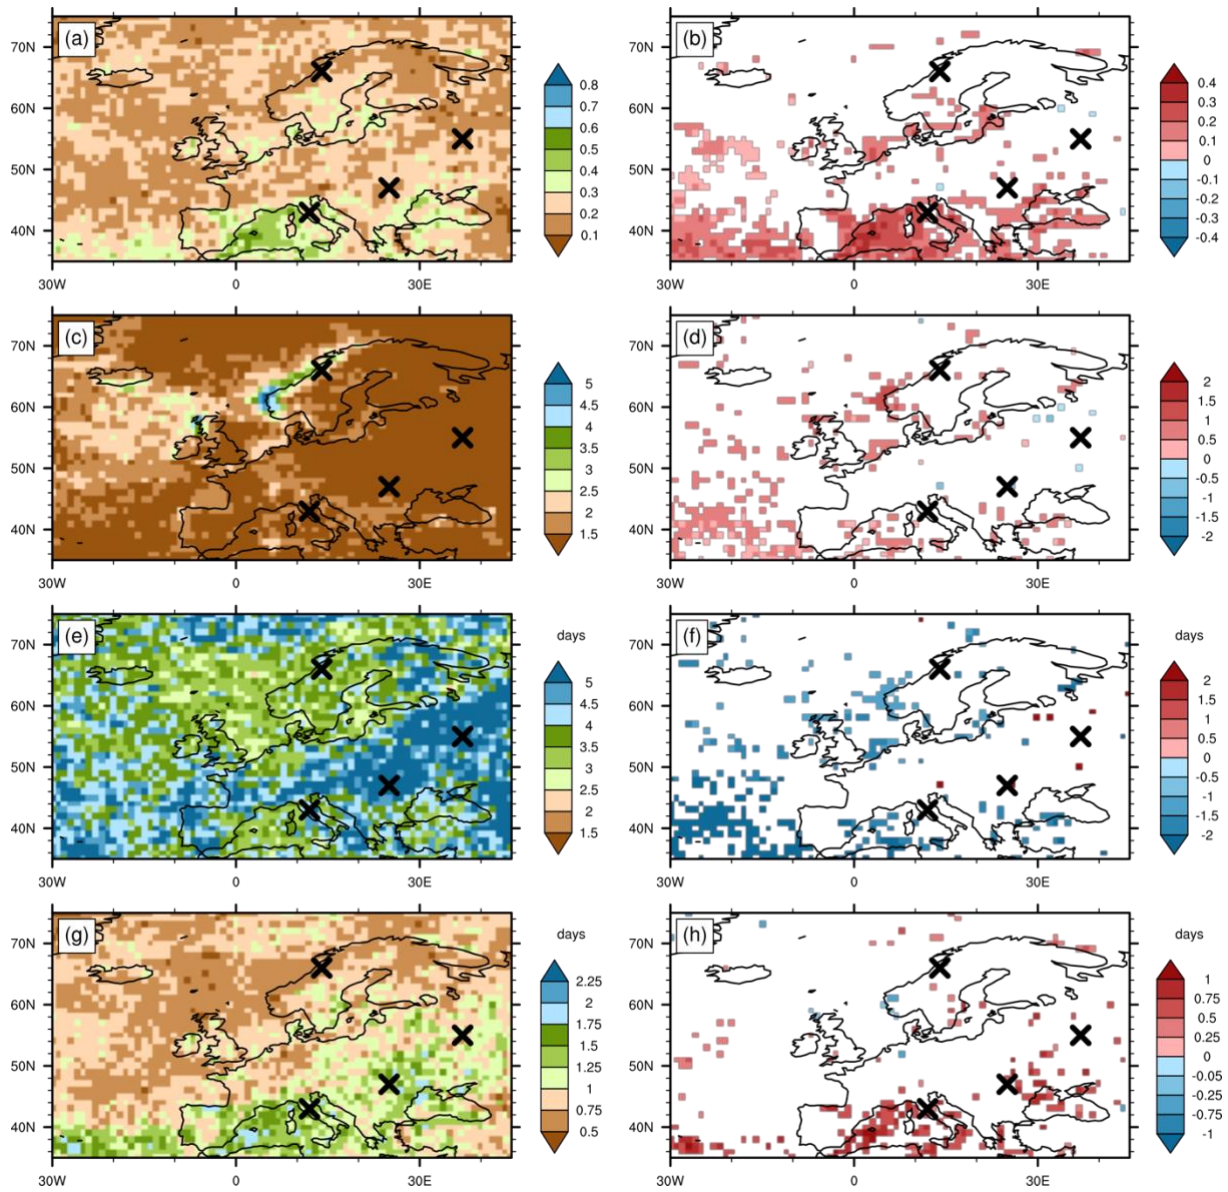

**Figure S8.** As Fig. 9 but with  $r = 200$  km.

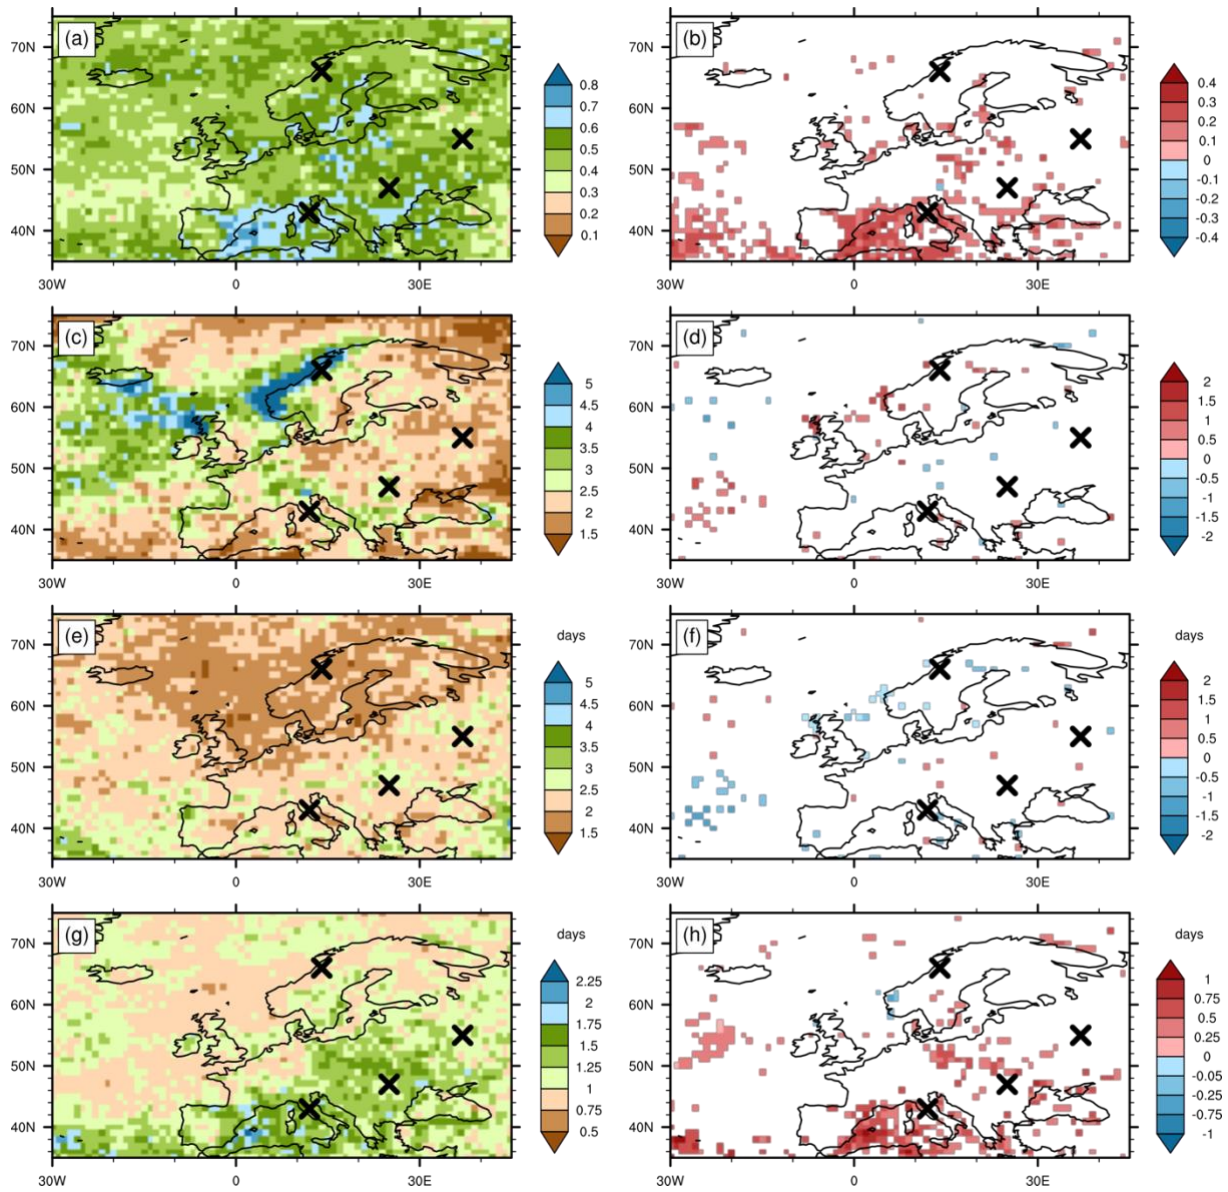

40 **Figure S9.** As Fig. 9 but with  $r = 600$  km.
